# Supplementary material for: Bio-inspired color-changing and self-healing hybrid hydrogels for wearable sensors and adaptive camouflage
Source: Royal Society of Chemistry journal article supplement (doi:10.1039/d2tc03102g), 2022-11-25
Supplement: d2tc03102g1.pdf [file d2tc03102g1.pdf]

## Supporting information

# **Bio-inspired Color-changing and Self-healing Hybrid Hydrogel for Wearable Sensors and Adaptive Camouflage**

Han Liu, Long Yu, Bingqian Zhao, Yezhou Ni, Peng Gu\*, Hua Qiu, Wan Zhang, Kunlin Chen\*

Key Laboratory of Eco-Textile, Ministry of Education, School of Textile Science and Engineering,

Jiangnan University, Wuxi 214122, China

E-mail: [chenkunlin@jiangnan.edu.cn](mailto:chenkunlin@jiangnan.edu.cn); [Tommy861007@hotmail.com](mailto:Tommy861007@hotmail.com)

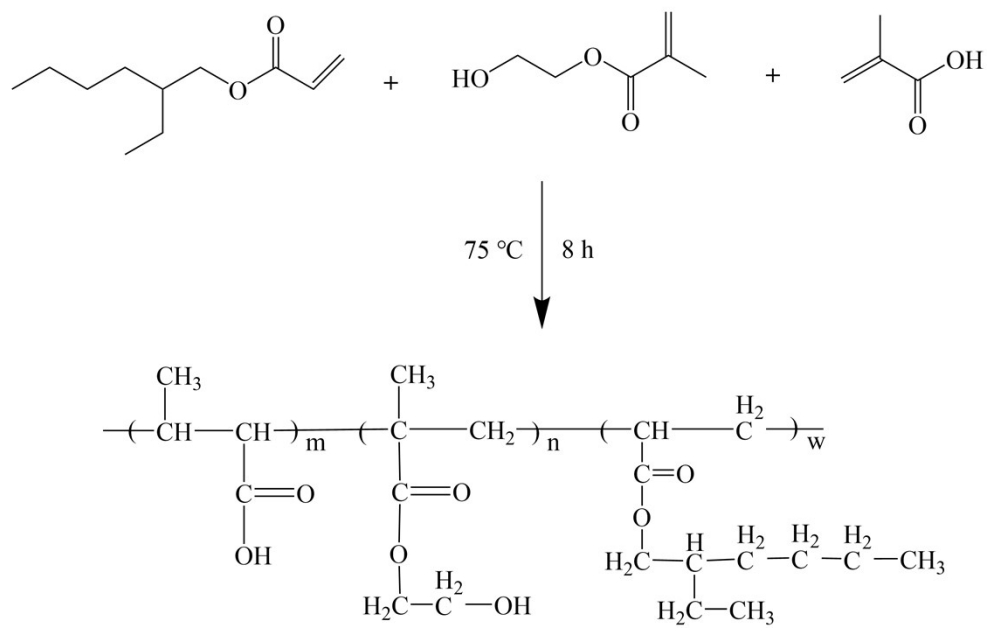

**Fig. S1** The synthetic route of polyacrylate

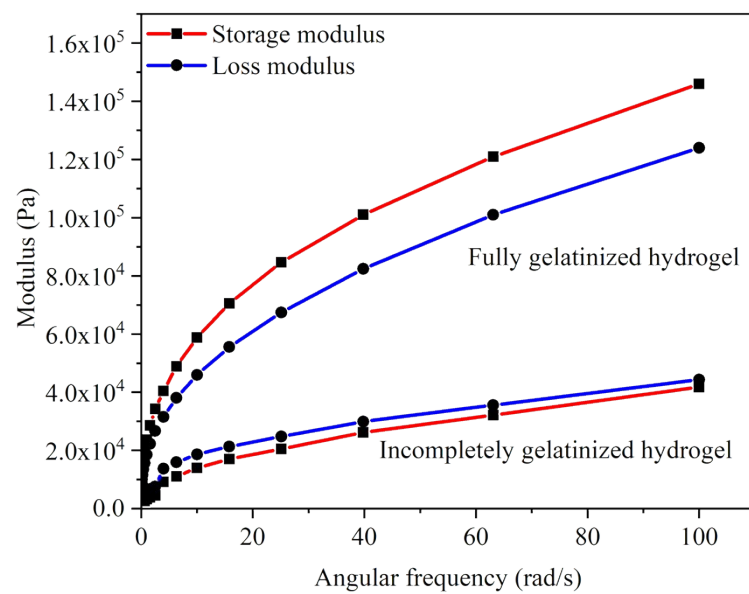

**Fig. S2** Rheological testing of fully gelatinized and incompletely gelatinized hydrogels

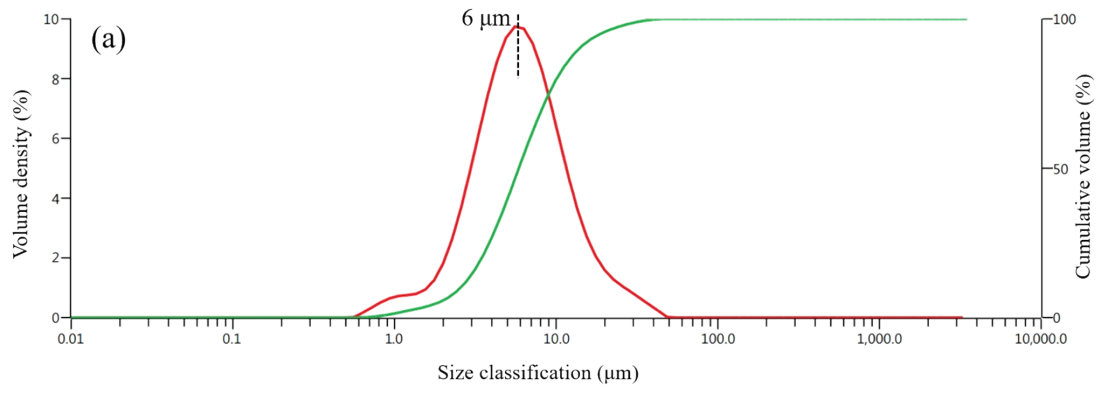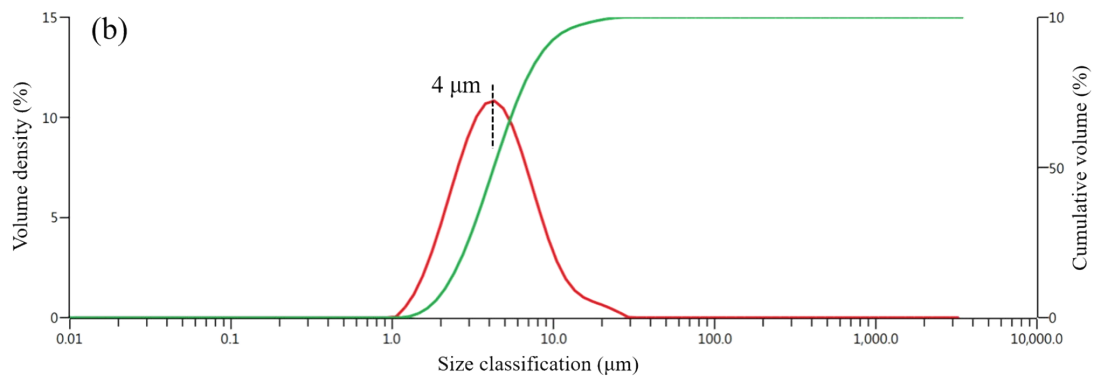

**Fig. S3 (a)** Particle size distribution of PDM. **(b)** Particle size distribution of TDM

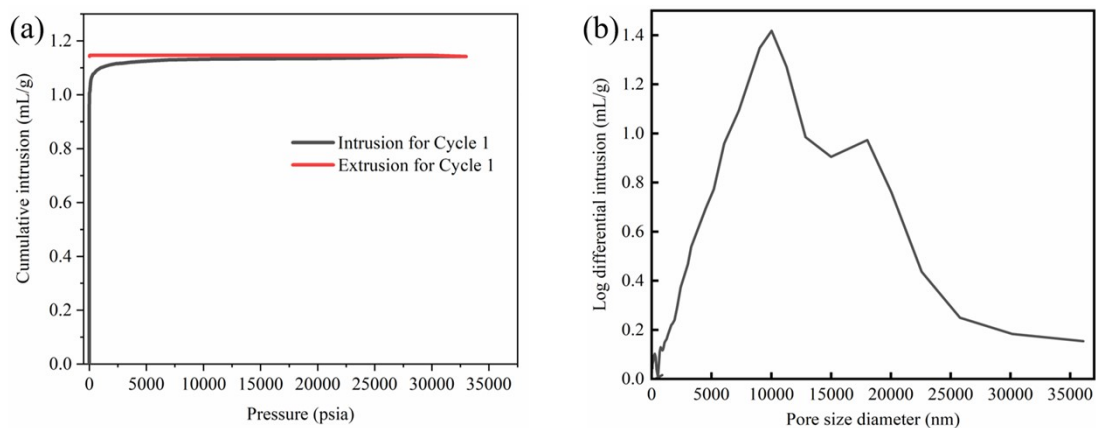

**Fig. S4** (a) Curves for mercury injection/withdrawal. (b) Curves of the pore size distribution

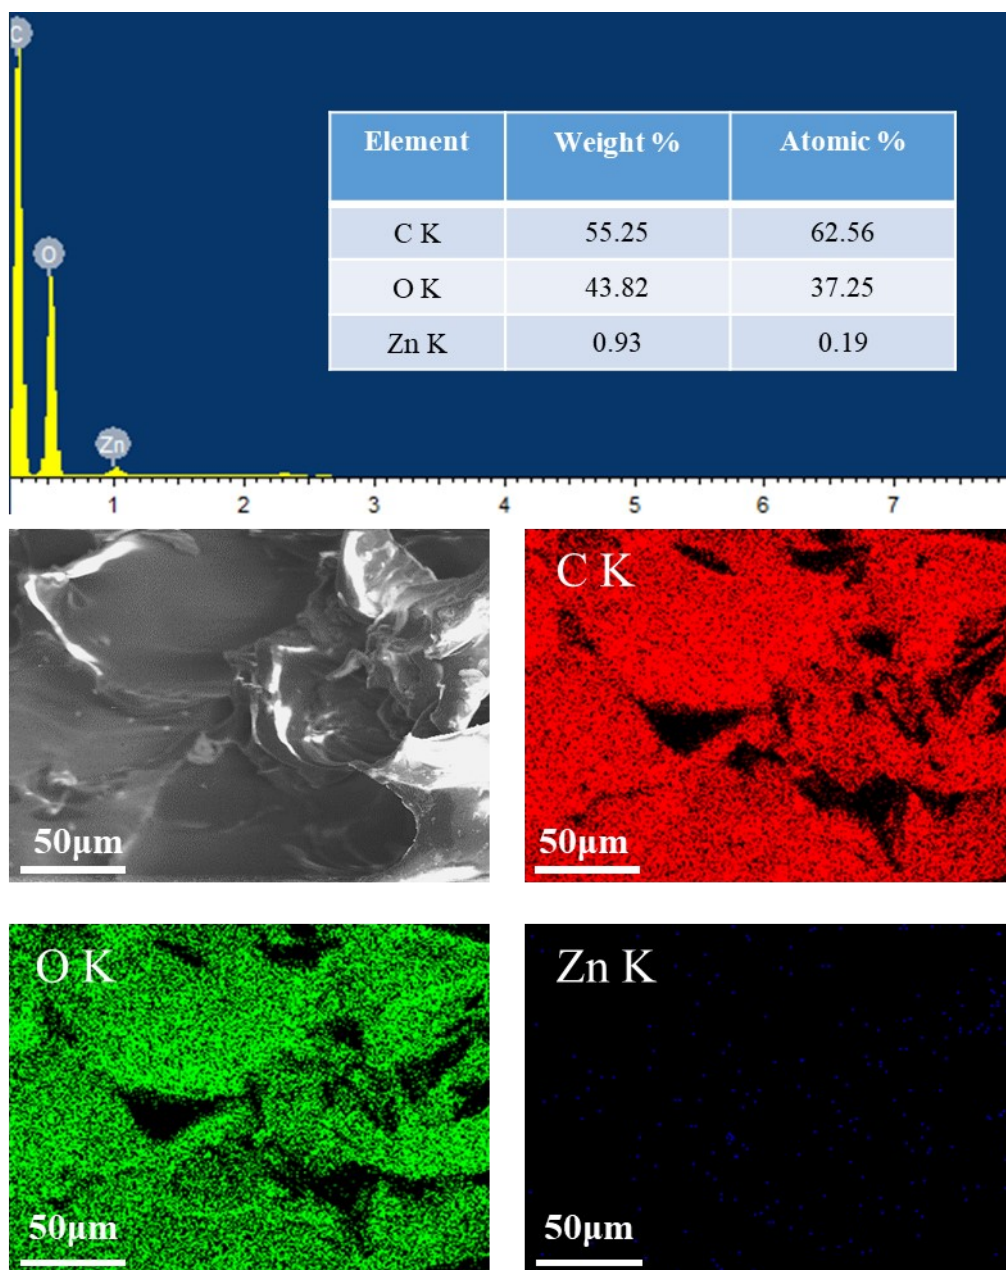

**Fig. S5** EDS spectrum and mapping analysis of the TDM/PDM/polyacrylate hybrid hydrogel

**Table S1.** List of tensile strength of other hydrogels from different reports hydrogels

|                                            | <b>Sample size</b>             | <b>stress</b> | <b>strain</b> | <b>Ref.</b> |
|--------------------------------------------|--------------------------------|---------------|---------------|-------------|
| <b>CCAP hydrogel</b>                       | 42 mm×25 mm×2mm                | 40 KPa        | 70%           | 1           |
| <b>DN hydrogel</b>                         | 10 mm×4 mm×1mm                 | 1.2 MPa       | 700%          | 2           |
| <b>Hybrid hydrogel</b>                     | D=4.2 mm<br>L=30 mm<br>Clavate | 11 KPa        | 112%          | 3           |
| <b>SV3/PVA-1-3 hydrogel</b>                | D=0.7 mm<br>L=12 mm<br>Clavate | 45 KPa        | 60%           | 4           |
| <b>RSF/G hydrogel</b>                      | 50 mm×10 mm×1mm                | 0.21 MPa      | 80%           | 5           |
| <b>pCBM/pSB hydrogel</b>                   | 30 mm×10 mm×1mm                | 1.23 MPa      | 93%           | 6           |
| <b>EO@AMS/polyacrylate hybrid hydrogel</b> | 20 mm×5 mm×1.5 mm              | 0.08 MPa      | 710%          | 7           |
| <b>This work</b>                           | 30 mm×20 mm×2 mm               | 0.015 MPa     | 1180%         |             |

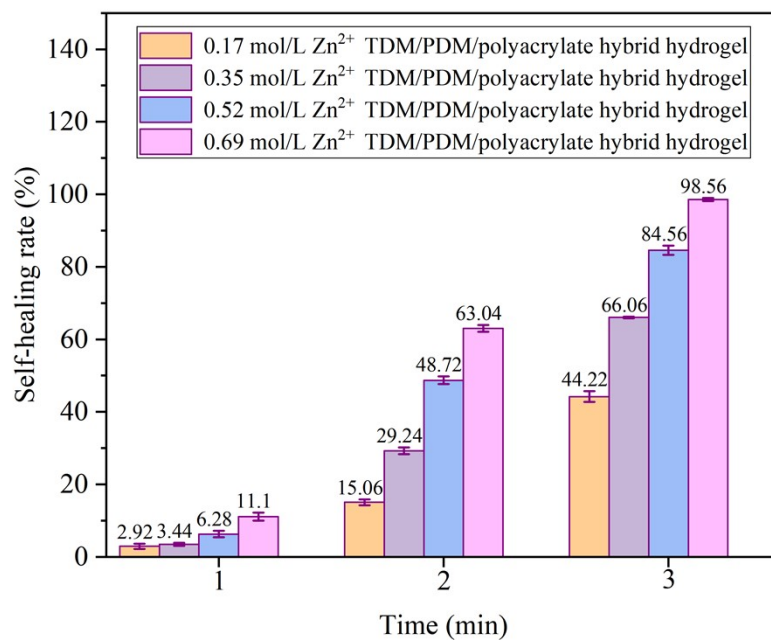

**Fig. S6** Effect of different ratios of zinc ions on the self-healing rate of TDM/PDM/polyacrylate hybrid hydrogel



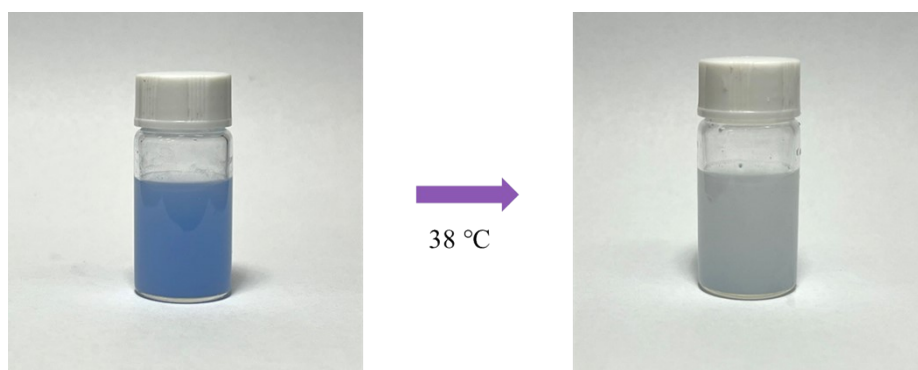

**Fig. S7** The thermochromic property of aqueous solution of TDM

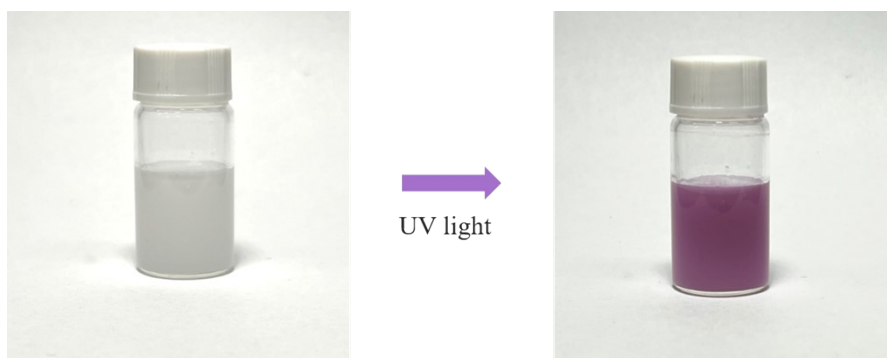

**Fig. S8** The photochromic property of aqueous solution of PDM

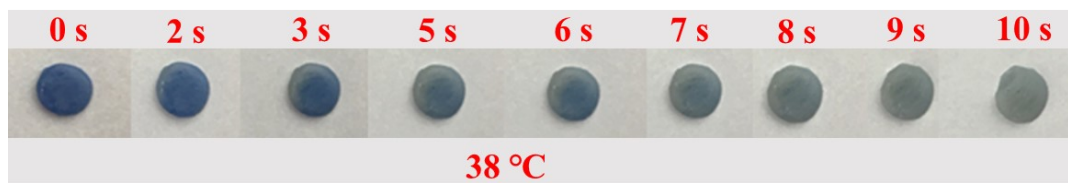

**Fig. S9** The thermochromic property of TCM/polyacrylate hybrid hydrogel

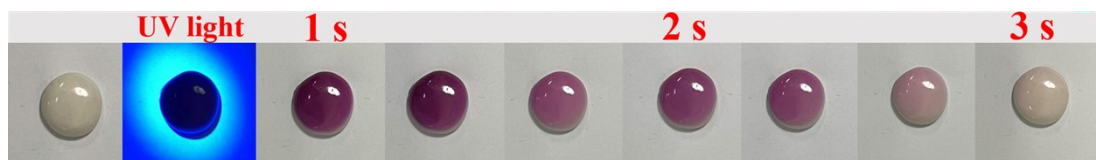

**Fig. S10** The photochromic property of PDM/polyacrylate hybrid hydrogel

## Reference

- 1 Y. Wang, H. Qin, Z. Li, J. Dai, H. Cong, S. Yu, Highly compressible and environmentally adaptive conductors with high-tortuosity interconnected cellular architecture, *Nat. Synth.*, 2022.
- 2 J. Peng, M. Zhou, T. Gao, J. Wang, Y. Cao, W. Wang, D. Wu, Y. Yang, A mechanically robust all-solid-state supercapacitor based on a highly conductive double-network hydrogel electrolyte and  $Ti_3C_2T_x$  MXene electrode with anti-freezing property†g, *J. Mater. Chem. A*, 2021, **9**, 25073.
- 3 G. Zhang, Y. Chen, Y. Deng, C. Wang, A triblock copolymer design leads to robust hybrid hydrogels for high-performance flexible supercapacitors, *ACS Appl. Mater. Interfaces*, 2017, **9**, 36301-36310.
- 4 X. Zhou, A. Rjeev, A. Subramanian, Y. Li, N. Rossetti, G. Natale, G. Lodygensky, F. Cicoira, Self-healing, stretchable, and highly adhesive hydrogels for epidermal patch electrodes, *Acta Biomater.*, 2022, **139**, 296-306.
- 5 L. Jiang, D. Su, S. Ding, Q. Zhang, Z. Li, F. Chen, W. Ding, S. Zhang, J. Dong, Salt-assisted toughening of protein hydrogel with controlled degradation for bone regeneration, *Adv. Funct. Mater.*, 2022, **29**, 1901314.
- 6 M. Yao, Z. Wei, J. Li, Z. Guo, Z. Yan, X. Sun, Q. Yu, X. Wu, C. Yu, F. Yao, S. Feng, H. Zhang, J. Li. Microgel reinforced zwitterionic hydrogel coating for blood-contacting biomedical devices, *Nat. Commun.*, 2022, **13**, 5339.
- 7 H. Liu, Y. Ni, J. Hu, Y. Jin, P. Gu, H. Qiu, K. Chen, Self-healing and antibacterial essential oil-loaded mesoporous silica/polyacrylate hybrid hydrogel for high-

performance wearable body-strain sensing, *ACS Appl. Mater. Interfaces*, 2022, **14**, 21509-21520.
